# Supplementary material for: Heme oxygenase metabolites improve astrocytic mitochondrial function via a Ca2+-dependent HIF-1α/ERRα circuit
Source: PubMed Central journal article supplement (PMC6112640; doi:10.1371/journal.pone.0202039), 2018-08-28

**Fig 1C**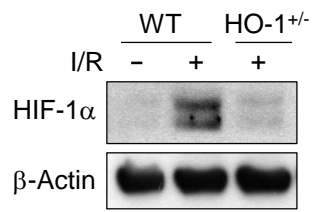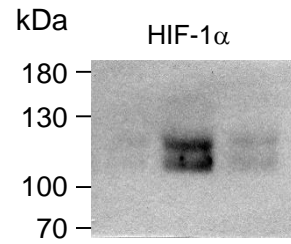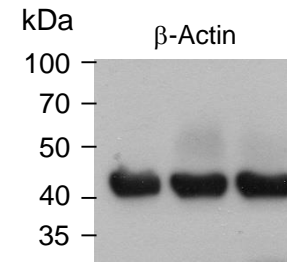**Fig 2A**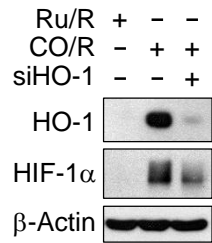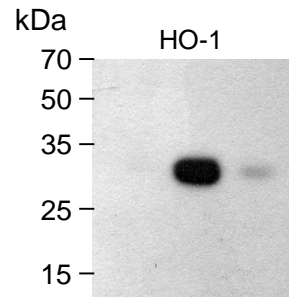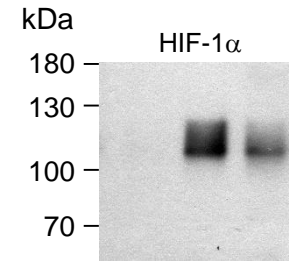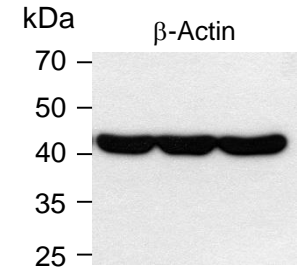**Fig 2B**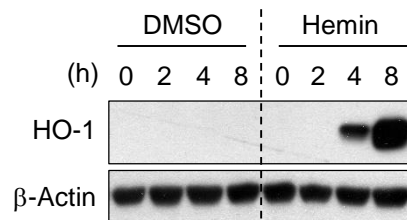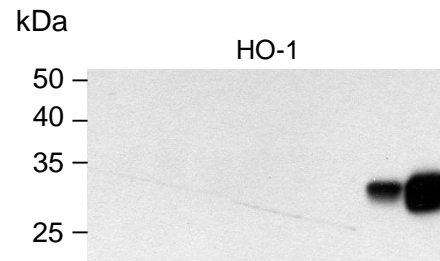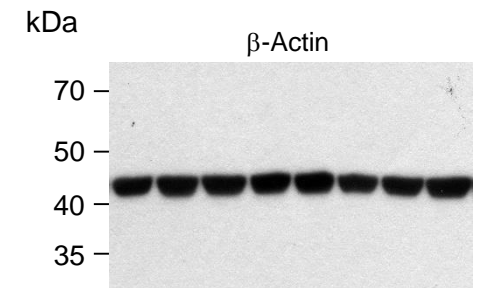

**Fig 2C**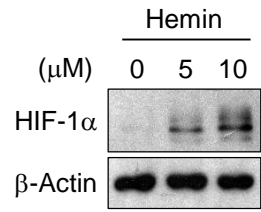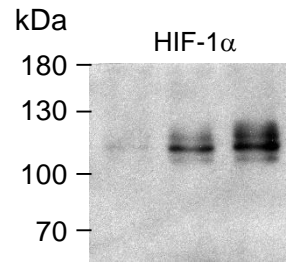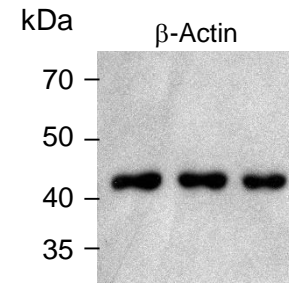**Fig 2D**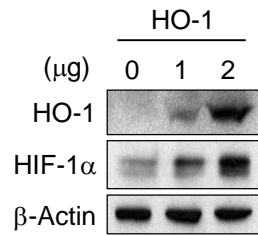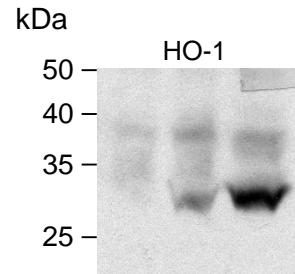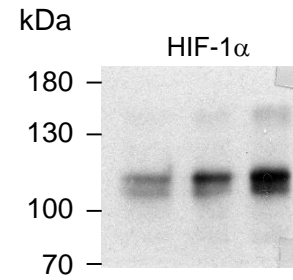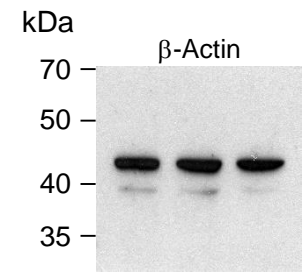**Fig 2E**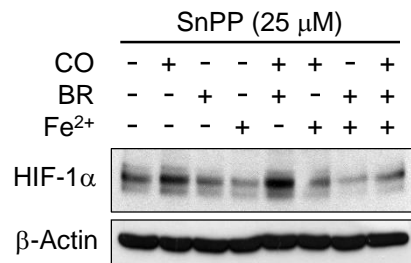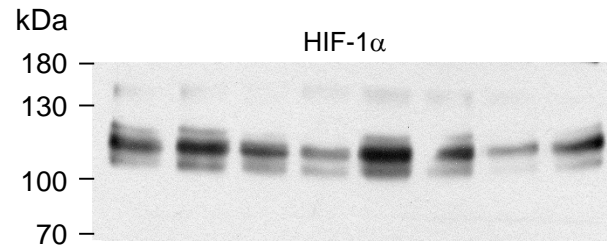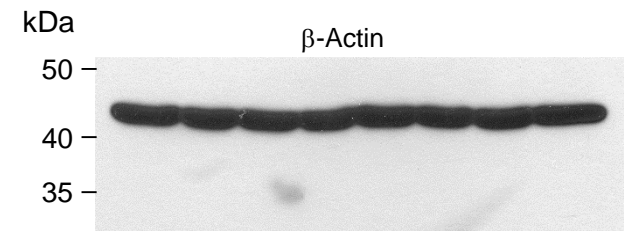

**Fig 2F**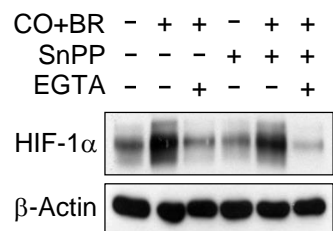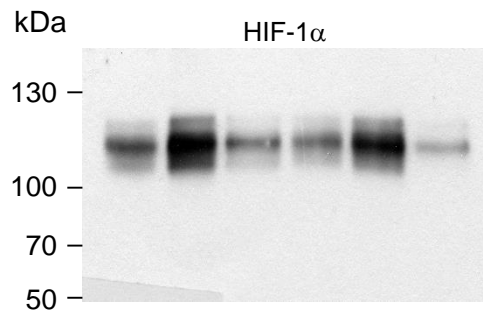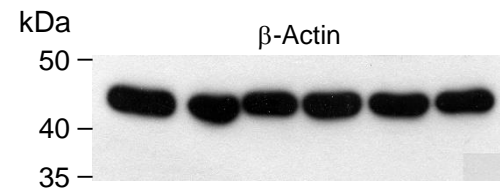**Fig 2G**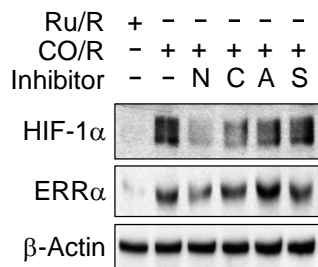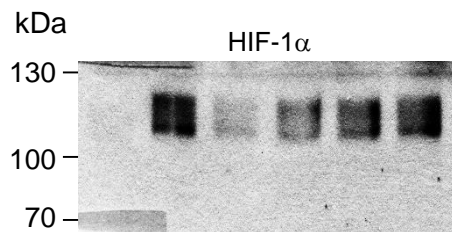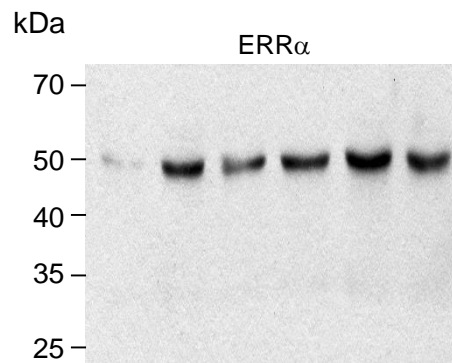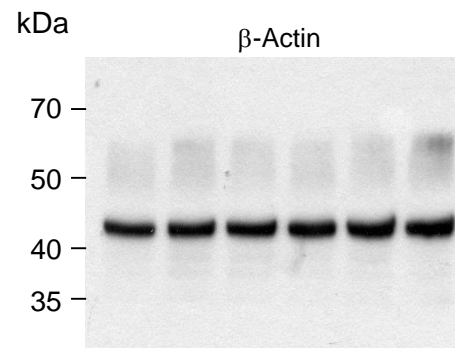**Fig 3A**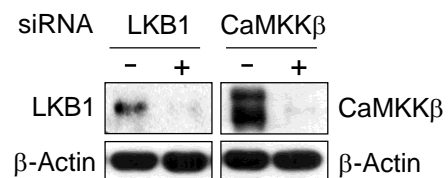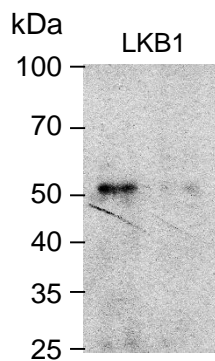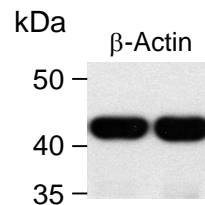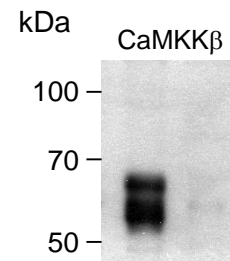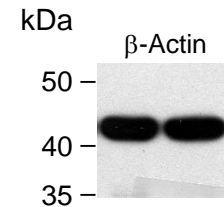

**Fig 3B**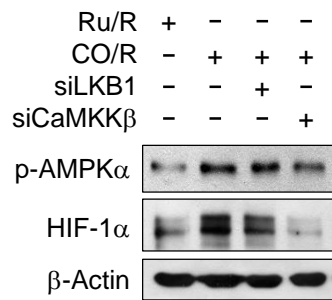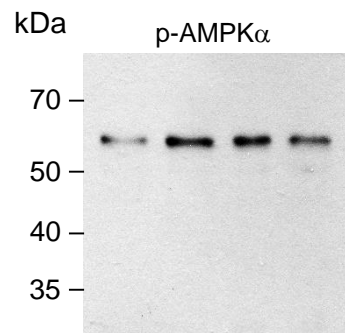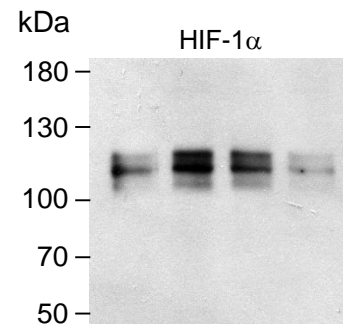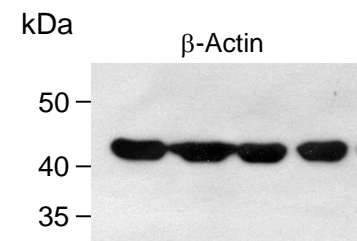**Fig 3C**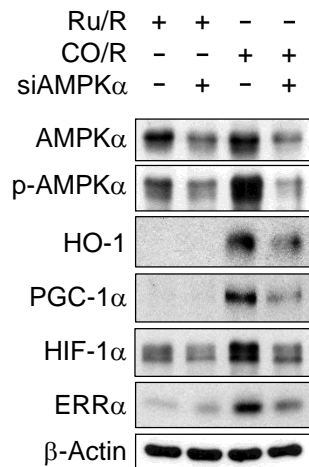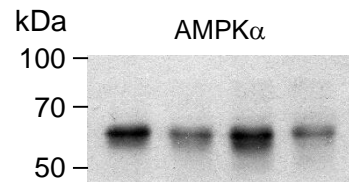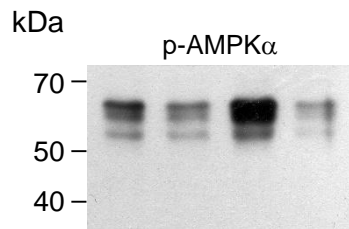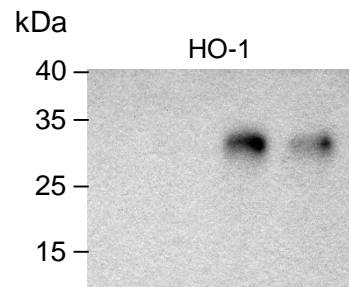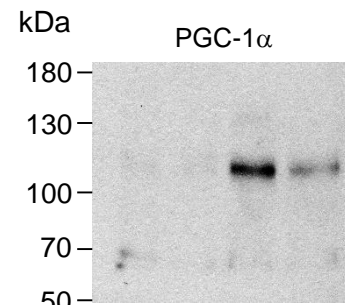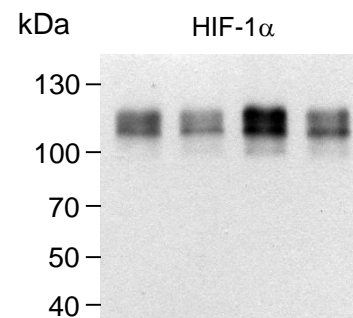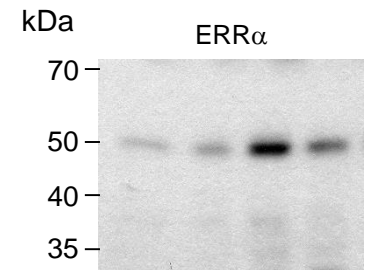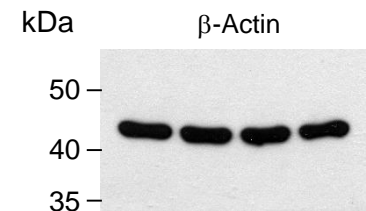

**Fig 3D**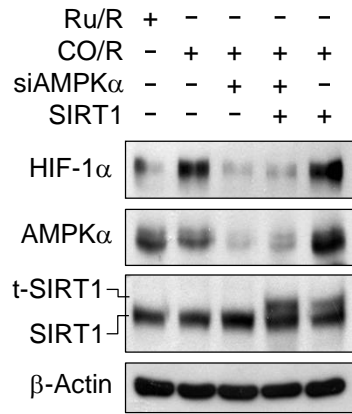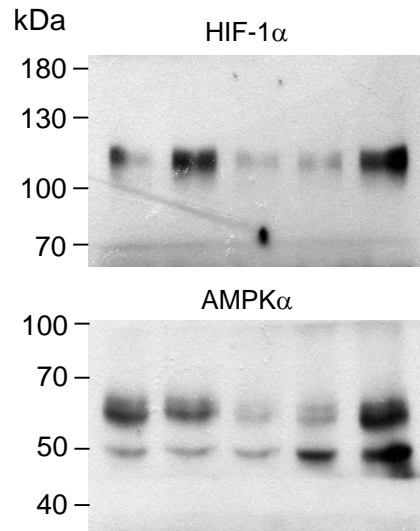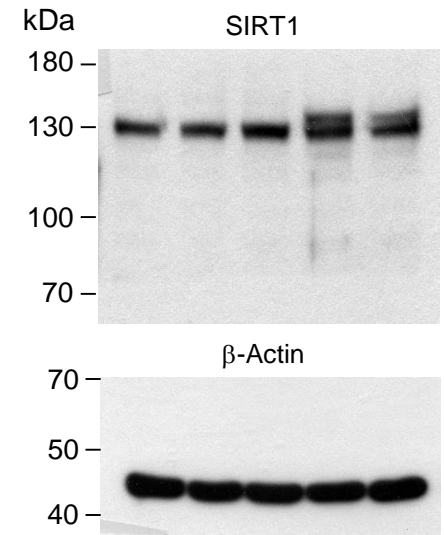**Fig 4F**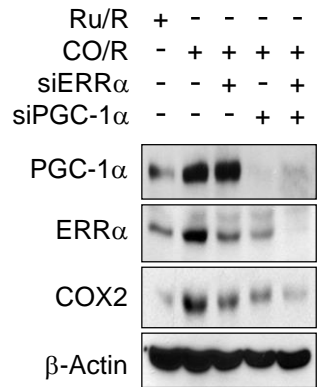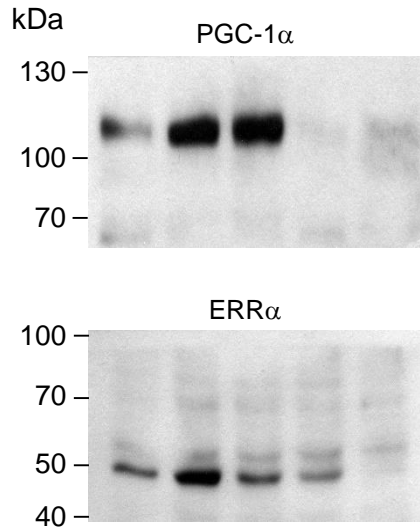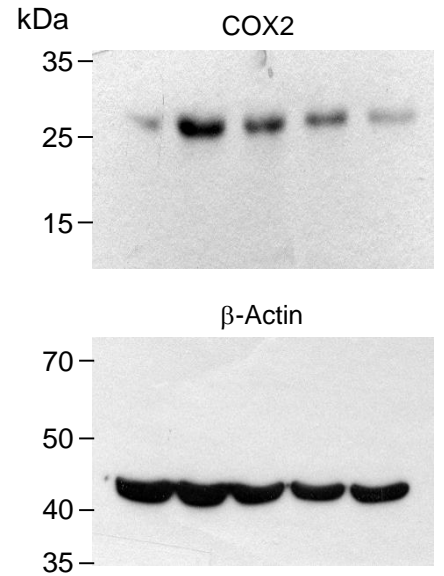

**Fig 5A**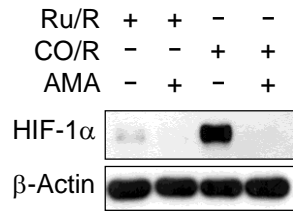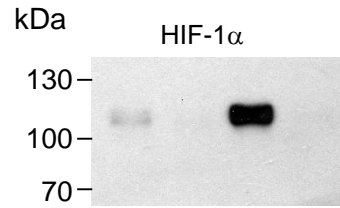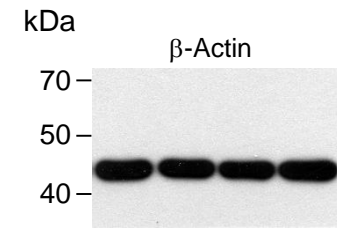**Fig 5B**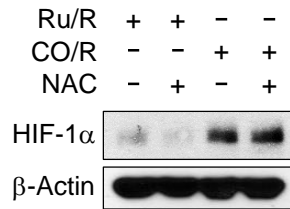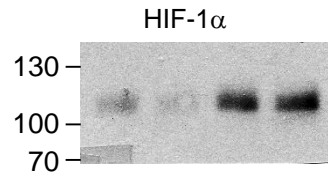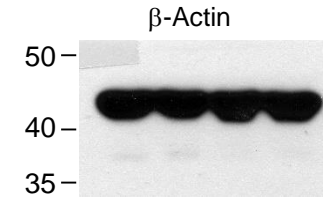**Fig 5C**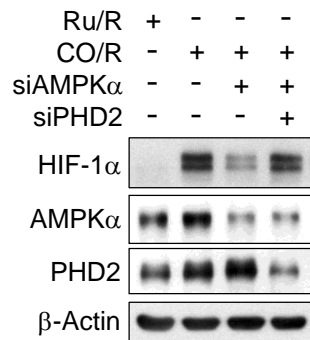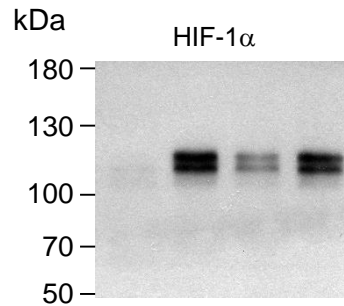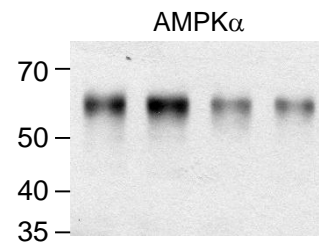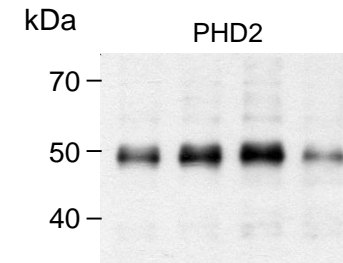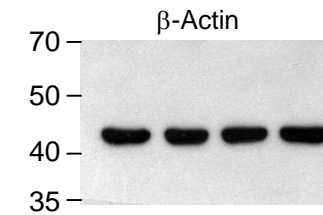

**Fig 5D**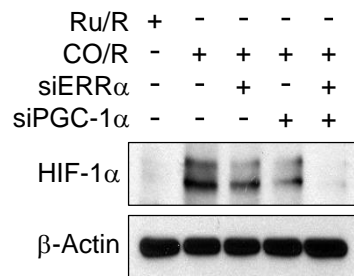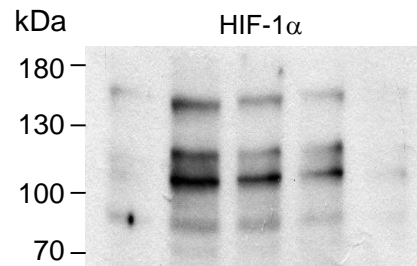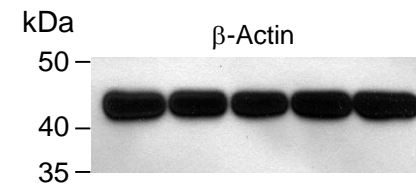**Fig 5F**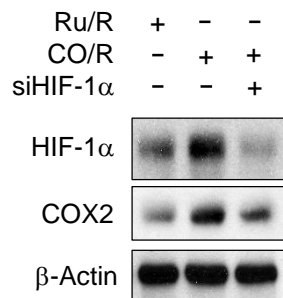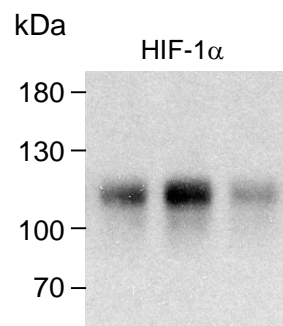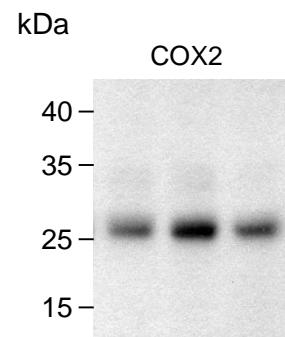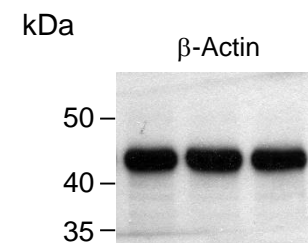**Fig 6A**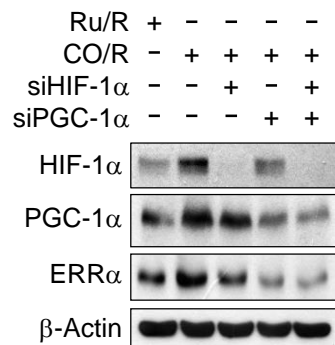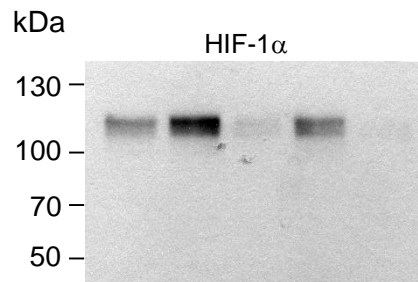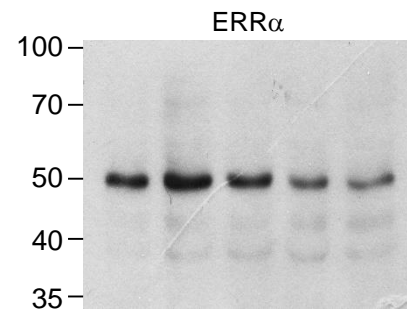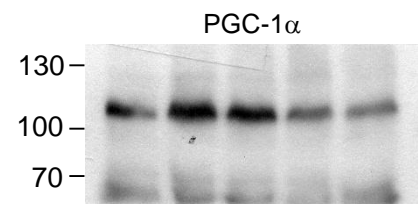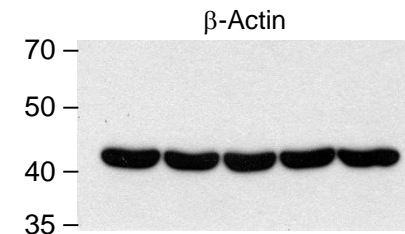

**S1A Fig**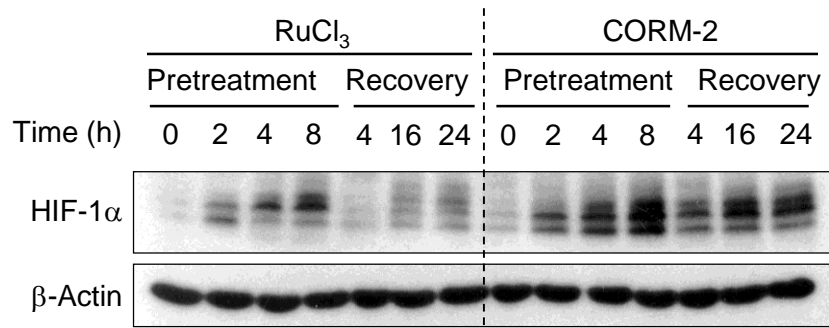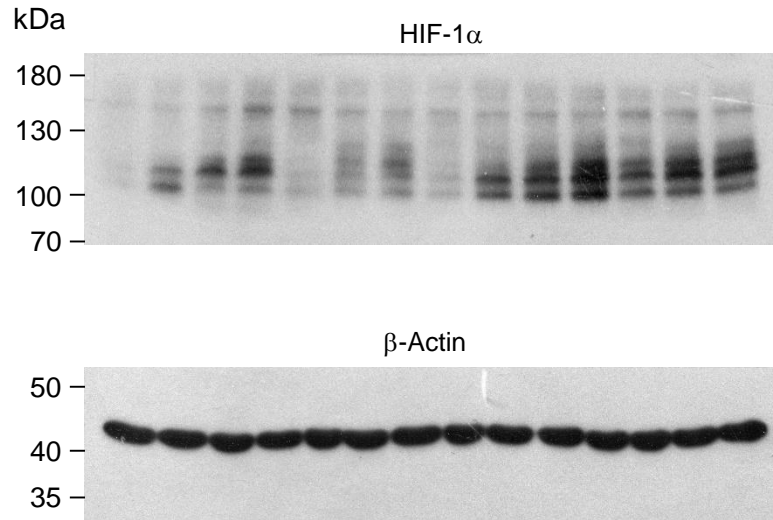**S1C Fig**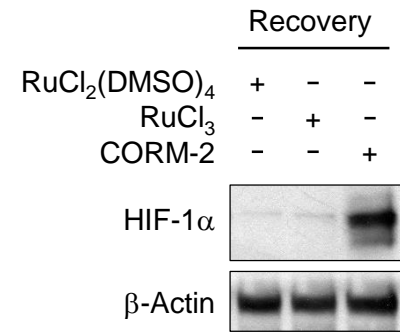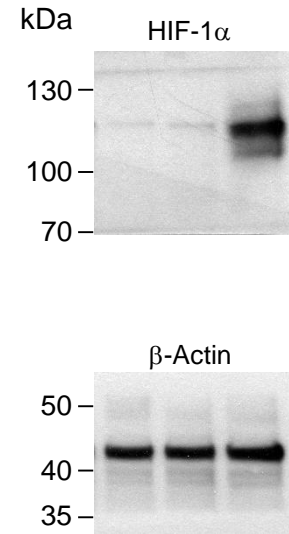

Supplement: pone.0202039.s002.pdf [file pone.0202039.s002.pdf]
